# Supplementary material for: Aerobic glycolysis fuels platelet activation: small-molecule modulators of platelet metabolism as anti-thrombotic agents
Source: PubMed Central journal article supplement — Haematologica. 2018 Oct 31;104(4):806–18. doi: 10.3324/haematol.2018.205724 (PMC6442984; doi:10.3324/haematol.2018.205724), 2019-04
Supplement: 2018_205724-Disclosures_and_Contributions.pdf [file 2018_205724-Disclosures_and_Contributions.pdf]

Haematologica  
HAEMATOL/2018/205724  
Version 3

Aerobic glycolysis fuels platelet activation: small-molecule modulators  
of platelet metabolism as anti-thrombotic agents

Paresh P. Kulkarni, Arundhati Tiwari, Nitesh Singh, Deepa Gautam,  
Vijay K. Sonkar, Vikas Agarwal, and Debabrata Dash

Disclosures: None

Contributions: D.D. supervised the entire work; D.D., P.P.K. and A.T. designed the research and analyzed results; P.P.K. and N.S. performed animal studies; A.T., D. and P.P.K. carried out human platelet experiments; A.T. and V.K.S. performed high-resolution respirometry; D.D., P.P.K. and A.T. wrote the paper; V.A. provided human blood samples and interpreted results.
